# Supplementary material for: Management of chronic spontaneous urticaria: a worldwide perspective
Source: PubMed Central journal article supplement (PMC6030778; doi:10.1186/s40413-018-0193-4), 2018-07-04
Supplement: 40413_2018_193_MOESM1_ESM.pdf [file 40413_2018_193_MOESM1_ESM.pdf]

## Survey on chronic spontaneous urticaria: a worldwide perspective

### 1 Your country of residence:

- |                                                         |                                          |                                        |
|---------------------------------------------------------|------------------------------------------|----------------------------------------|
| <input type="radio"/> Afghanistan                       | <input type="radio"/> Costa Rica         | <input type="radio"/> Italy            |
| <input type="radio"/> Algeria                           | <input type="radio"/> Côte d'Ivoire      | <input type="radio"/> Jamaica          |
| <input type="radio"/> American Samoa                    | <input type="radio"/> Croatia            | <input type="radio"/> Japan            |
| <input type="radio"/> Andorra                           | <input type="radio"/> Cuba               | <input type="radio"/> Jordan           |
| <input type="radio"/> Angola                            | <input type="radio"/> Cyprus             | <input type="radio"/> Kazakhstan       |
| <input type="radio"/> Antigua and Barbuda               | <input type="radio"/> Czech Republic     | <input type="radio"/> Kenya            |
| <input type="radio"/> Argentina                         | <input type="radio"/> Denmark            | <input type="radio"/> Kiribati         |
| <input type="radio"/> Armenia                           | <input type="radio"/> Djibouti           | <input type="radio"/> North Korea      |
| <input type="radio"/> Australia                         | <input type="radio"/> Dominica           | <input type="radio"/> South Korea      |
| <input type="radio"/> Austria                           | <input type="radio"/> Dominican Republic | <input type="radio"/> Kosovo           |
| <input type="radio"/> Azerbaijan                        | <input type="radio"/> East Timor         | <input type="radio"/> Kuwait           |
| <input type="radio"/> Bahamas                           | <input type="radio"/> Ecuador            | <input type="radio"/> Kyrgyzstan       |
| <input type="radio"/> Bahrain                           | <input type="radio"/> Egypt              | <input type="radio"/> Laos             |
| <input type="radio"/> Bangladesh                        | <input type="radio"/> El Salvador        | <input type="radio"/> Latvia           |
| <input type="radio"/> Barbados                          | <input type="radio"/> Equatorial Guinea  | <input type="radio"/> Lebanon          |
| <input type="radio"/> Belarus                           | <input type="radio"/> Eritrea            | <input type="radio"/> Lesotho          |
| <input type="radio"/> Belgium                           | <input type="radio"/> Estonia            | <input type="radio"/> Liberia          |
| <input type="radio"/> Belize                            | <input type="radio"/> Ethiopia           | <input type="radio"/> Libya            |
| <input type="radio"/> Benin                             | <input type="radio"/> Faroe Islands      | <input type="radio"/> Liechtenstein    |
| <input type="radio"/> Bermuda                           | <input type="radio"/> Fiji               | <input type="radio"/> Lithuania        |
| <input type="radio"/> Bhutan                            | <input type="radio"/> Finland            | <input type="radio"/> Luxembourg       |
| <input type="radio"/> Bolivia                           | <input type="radio"/> France             | <input type="radio"/> Macedonia        |
| <input type="radio"/> Bosnia and Herzegovina            | <input type="radio"/> French Polynesia   | <input type="radio"/> Madagascar       |
| <input type="radio"/> Botswana                          | <input type="radio"/> Gabon              | <input type="radio"/> Malawi           |
| <input type="radio"/> Brazil                            | <input type="radio"/> Gambia             | <input type="radio"/> Malaysia         |
| <input type="radio"/> Brunei                            | <input type="radio"/> Georgia            | <input type="radio"/> Maldives         |
| <input type="radio"/> Bulgaria                          | <input type="radio"/> Germany            | <input type="radio"/> Mali             |
| <input type="radio"/> Burkina Faso                      | <input type="radio"/> Ghana              | <input type="radio"/> Malta            |
| <input type="radio"/> Burundi                           | <input type="radio"/> Greece             | <input type="radio"/> Marshall Islands |
| <input type="radio"/> Cambodia                          | <input type="radio"/> Greenland          | <input type="radio"/> Mauritania       |
| <input type="radio"/> Cameroon                          | <input type="radio"/> Grenada            | <input type="radio"/> Mauritius        |
| <input type="radio"/> Canada                            | <input type="radio"/> Guam               | <input type="radio"/> Mexico           |
| <input type="radio"/> Cape Verde                        | <input type="radio"/> Guatemala          | <input type="radio"/> Micronesia       |
| <input type="radio"/> Cayman Islands                    | <input type="radio"/> Guinea             | <input type="radio"/> Moldova          |
| <input type="radio"/> Central African Republic          | <input type="radio"/> Guinea-Bissau      | <input type="radio"/> Monaco           |
| <input type="radio"/> Chad                              | <input type="radio"/> Guyana             | <input type="radio"/> Mongolia         |
| <input type="radio"/> Chile                             | <input type="radio"/> Haiti              | <input type="radio"/> Montenegro       |
| <input type="radio"/> China                             | <input type="radio"/> Honduras           | <input type="radio"/> Morocco          |
| <input type="radio"/> Colombia                          | <input type="radio"/> Hong Kong          | <input type="radio"/> Mozambique       |
| <input type="radio"/> Comoros                           | <input type="radio"/> Hungary            | <input type="radio"/> Myanmar          |
| <input type="radio"/> Congo, Democratic Republic of the | <input type="radio"/> Iceland            | <input type="radio"/> Namibia          |
| <input type="radio"/> Congo, Republic of the            | <input type="radio"/> India              | <input type="radio"/> Nauru            |
|                                                         | <input type="radio"/> Indonesia          | <input type="radio"/> Nepal            |
|                                                         | <input type="radio"/> Iran               | <input type="radio"/> Netherlands      |
|                                                         | <input type="radio"/> Iraq               | <input type="radio"/> New Zealand      |
|                                                         | <input type="radio"/> Ireland            | <input type="radio"/> Nicaragua        |
|                                                         | <input type="radio"/> Israel             | <input type="radio"/> Niger            |
|                                                         |                                          | <input type="radio"/> Nigeria          |

- |                                                        |                                             |                                               |
|--------------------------------------------------------|---------------------------------------------|-----------------------------------------------|
| <input type="radio"/> Northern Mariana Islands         | <input type="radio"/> Sao Tome and Principe | <input type="radio"/> Togo                    |
| <input type="radio"/> Norway                           | <input type="radio"/> Saudi Arabia          | <input type="radio"/> Tonga                   |
| <input type="radio"/> Oman                             | <input type="radio"/> Senegal               | <input type="radio"/> Trinidad and Tobago     |
| <input type="radio"/> Pakistan                         | <input type="radio"/> Serbia                | <input type="radio"/> Tunisia                 |
| <input type="radio"/> Palau                            | <input type="radio"/> Seychelles            | <input type="radio"/> Turkey                  |
| <input type="radio"/> Palestine, State of              | <input type="radio"/> Sierra Leone          | <input type="radio"/> Turkmenistan            |
| <input type="radio"/> Panama                           | <input type="radio"/> Singapore             | <input type="radio"/> Tuvalu                  |
| <input type="radio"/> Papua New Guinea                 | <input type="radio"/> Sint Maarten          | <input type="radio"/> Uganda                  |
| <input type="radio"/> Paraguay                         | <input type="radio"/> Slovakia              | <input type="radio"/> Ukraine                 |
| <input type="radio"/> Peru                             | <input type="radio"/> Slovenia              | <input type="radio"/> United Arab Emirates    |
| <input type="radio"/> Philippines                      | <input type="radio"/> Solomon Islands       | <input type="radio"/> United Kingdom          |
| <input type="radio"/> Poland                           | <input type="radio"/> Somalia               | <input type="radio"/> United States           |
| <input type="radio"/> Portugal                         | <input type="radio"/> South Africa          | <input type="radio"/> Uruguay                 |
| <input type="radio"/> Puerto Rico                      | <input type="radio"/> Spain                 | <input type="radio"/> Uzbekistan              |
| <input type="radio"/> Qatar                            | <input type="radio"/> Sri Lanka             | <input type="radio"/> Vanuatu                 |
| <input type="radio"/> Romania                          | <input type="radio"/> Sudan                 | <input type="radio"/> Vatican City            |
| <input type="radio"/> Russia                           | <input type="radio"/> Sudan, South          | <input type="radio"/> Venezuela               |
| <input type="radio"/> Rwanda                           | <input type="radio"/> Suriname              | <input type="radio"/> Vietnam                 |
| <input type="radio"/> Saint Kitts and Nevis            | <input type="radio"/> Swaziland             | <input type="radio"/> Virgin Islands, British |
| <input type="radio"/> Saint Lucia                      | <input type="radio"/> Sweden                | <input type="radio"/> Virgin Islands, U.S.    |
| <input type="radio"/> Saint Vincent and the Grenadines | <input type="radio"/> Switzerland           | <input type="radio"/> Yemen                   |
| <input type="radio"/> Samoa                            | <input type="radio"/> Syria                 | <input type="radio"/> Zambia                  |
| <input type="radio"/> San Marino                       | <input type="radio"/> Taiwan                | <input type="radio"/> Zimbabwe                |
|                                                        | <input type="radio"/> Tajikistan            |                                               |
|                                                        | <input type="radio"/> Tanzania              |                                               |
|                                                        | <input type="radio"/> Thailand              |                                               |

**2 Your gender:**

- Female  
 Male

**3 Your age:**

- Less than 30  
 30-39  
 40-49  
 50-59  
 60-69  
 Greater than 69

**4 Your specialty (Please choose all that apply):**

- Allergy/Immunology  
 Dermatology  
 Paediatrics  
 General practice  
 Other: \_\_\_\_\_

**5 Length of time in your current field of practice (years):**

- Less than 5 years
- Between 5 and 9 years
- Between 10 and 14 years
- Between 15 and 19 years
- Over 19

**6 You work at (Please choose all that apply):**

- Private practice
- University clinic
- Hospital
- Specialized urticaria centre
- Other: \_\_\_\_\_

**7 You primarily see:**

- Outpatients
- Inpatients
- Other

**8 You primarily see:**

- Adults
- Children
- Both

**9 How many Chronic Spontaneous Urticaria (CSU) patients do you see per week?**

- 0-5
- 6-9
- 10-20
- 21-30
- 31-40
- 41-50
- >50
- Other (please specify)

**10 How often do your CSU patients complain of angioedema? (% from the total number of patients)**

- Less than 10%
- 10-20%
- 21-30%
- 31-40%
- 41-50%

- 51-60%
- 61-70%
- 71-80%
- 81-90%
- Over 90%

**11 Please specify the urticaria guidelines you are aware of** (Please choose **all** that apply):

- EAACI/WAO/GA2LEN/EDF
- AAAAI practice parameter
- National guidelines
- I am not aware of any
- Other: \_\_\_\_\_

**12 Which of the guidelines do you follow in clinical practice** (Please choose **all** that apply):

- EAACI/WAO/GA2LEN/EDF
- AAAAI practice parameter
- National guidelines
- I don't use any
- Other: \_\_\_\_\_

**13 If you DO NOT FOLLOW OR DEVIATE from the guidelines, please indicate the reasons behind it** (Please choose **all** that apply):

- The guidelines do not undergo revision frequently enough
- I rely more on my own clinical experience
- I do not agree with the guidelines' recommendations and/or conclusions
- Some of the recommendations are unclear to me and require further detailization
- Some of the guidelines' recommendations cannot be implicated in my country of residence
- I had a negative experience with following the guidelines in my clinical practice
- Overly simplified approach to CSU management recommended by the guidelines that does not reflect the complexity of the disease
- The discrepancy and/or disagreement between the guidelines
- Not applicable
- Other: \_\_\_\_\_

**14 Which of the following tests do you order or perform in all CSU patients?** (Please choose **all** that apply):

- Complete blood count (CBC) with differential
- Erythrocyte sedimentation rate (ESR)
- C-reactive protein (CRP)
- Anti-thyroid antibodies (anti-TG/TPO)
- Thyroid stimulating hormone (TSH)

- Total IgE
- Eosinophil cationic protein (ECP)
- D-dimer
- Skin prick tests
- Allergen-specific IgE
- Antinuclear antibodies (ANA)
- Tryptase
- Autologous serum skin test (ASST)
- Search for chronic infections
- None
- Other: \_\_\_\_\_

**15 Which of the following tests do you order or perform in patients with long-standing (>6 months), severe (symptoms interfering with normal daily activity and sleep) and poorly-controlled disease (lack of response to antihistamines)? (Check any that apply in addition to those selected in previous question):**

- CBC with differential
- ESR
- CRP
- Anti-thyroid antibodies (anti-TG/TPO)
- TSH
- Total IgE
- ECP
- D-dimer
- Skin prick tests
- Allergen-specific IgE
- ANA
- Tryptase
- ASST
- Search for chronic infections
- None
- Other: \_\_\_\_\_

**16 How often do you elucidate a cause of CSU, %? (Note: the cause of CSU is the condition that when treated leads to improvement or resolution of CSU):**

- Less than 10%
- 10-20%
- 21-30%
- 31-40%
- 41-50%
- 51-60%
- 61-70%
- 71-80%
- 81-90%
- Over 90%

**17 What are the common etiologies of CSU in your patients? (Please rank the frequency of CSU causes from 1 to 8: the most common cause - 1, the least common - 8)**

- Idiopathic
- Type-I-Allergy
- Autoimmunity/autoreactivity
- Underlying systemic disorders
- Malignancy
- Chronic infections
- Food intolerance
- Non-neoplasm underlying systemic disorder
- Others

**18 Which of the following medications do you administer a CSU patient as a first-line treatment? (Multiple answers will be regarded as a combination of medications used in the same patient):**

- First-generation H1-antihistamines
- Second-generation H1-antihistamines at standard dose
- Updosed second-generation H1-antihistamines (2-4 times the standard dose)
- H2-antihistamines (e.g. famotidine or ranitidine)
- Ciclosporin
- Omalizumab
- Montelukast
- Dapsone
- Systemic corticosteroids (for less than 10 days)
- Systemic corticosteroids (for more than 10 days in a row)
- Other: \_\_\_\_\_

**19 Which of the following medications do you administer a CSU patient as a second-line treatment? (Multiple answers will be regarded as a combination of medications used in the same patient. Answer this question independently from question #18):**

- First-generation H1-antihistamines
- Second-generation H1-antihistamines at standard dose
- Updosed second-generation H1-antihistamines (2-4 times the standard dose)
- H2-antihistamines (e.g. famotidine or ranitidine)
- Ciclosporin
- Omalizumab
- Montelukast
- Dapsone
- Systemic corticosteroids (for less than 10 days)
- Systemic corticosteroids (for more than 10 days in a row)
- Other: \_\_\_\_\_

**20 Which of the following medications do you administer a CSU patient as a third-line treatment?** (Multiple answers will be regarded as a combination of medications used in the same patient. Answer this question independently from questions #18, 19):

- First-generation H1-antihistamines
- Second-generation H1-antihistamines at standard dose
- Updosed second-generation H1-antihistamines (2-4 times the standard dose)
- H2-antihistamines (e.g. famotidine or ranitidine)
- Ciclosporin
- Omalizumab
- Montelukast
- Dapsone
- Systemic corticosteroids ( for less than 10 days)
- Systemic corticosteroids ( for more than 10 days in a row)
- Other: \_\_\_\_\_

**21 Please indicate your opinion on the overall efficacy of the following agents in treatment of CSU.** Please choose the appropriate response for each item:

|                                                                         | Very high             | High                  | Moderate              | Low                   | Not effective         |
|-------------------------------------------------------------------------|-----------------------|-----------------------|-----------------------|-----------------------|-----------------------|
| H1-antihistamines of first generation                                   | <input type="radio"/> | <input type="radio"/> | <input type="radio"/> | <input type="radio"/> | <input type="radio"/> |
| H1-antihistamines of second generation in standard dose                 | <input type="radio"/> | <input type="radio"/> | <input type="radio"/> | <input type="radio"/> | <input type="radio"/> |
| H1-antihistamines of second generation in high doses (2-4 times higher) | <input type="radio"/> | <input type="radio"/> | <input type="radio"/> | <input type="radio"/> | <input type="radio"/> |
| H2-antihistamines (e.g. famotidine or ranitidine)                       | <input type="radio"/> | <input type="radio"/> | <input type="radio"/> | <input type="radio"/> | <input type="radio"/> |
| Ciclosporin                                                             | <input type="radio"/> | <input type="radio"/> | <input type="radio"/> | <input type="radio"/> | <input type="radio"/> |
| Omalizumab                                                              | <input type="radio"/> | <input type="radio"/> | <input type="radio"/> | <input type="radio"/> | <input type="radio"/> |
| Montelukast                                                             | <input type="radio"/> | <input type="radio"/> | <input type="radio"/> | <input type="radio"/> | <input type="radio"/> |
| Dapsone                                                                 | <input type="radio"/> | <input type="radio"/> | <input type="radio"/> | <input type="radio"/> | <input type="radio"/> |
| Systemic corticosteroids (for less than                                 | <input type="radio"/> | <input type="radio"/> | <input type="radio"/> | <input type="radio"/> | <input type="radio"/> |

|                                                                       | <b>Very high</b>      | <b>High</b>           | <b>Moderate</b>       | <b>Low</b>            | <b>Not effective</b>  |
|-----------------------------------------------------------------------|-----------------------|-----------------------|-----------------------|-----------------------|-----------------------|
| 10 days)<br>Systemic corticosteroids (for more than 10 days in a row) | <input type="radio"/> | <input type="radio"/> | <input type="radio"/> | <input type="radio"/> | <input type="radio"/> |

**22 Please assess tolerability of the following agents in treatment of CSU.** Please choose the appropriate response for each item:

|                                                                         | <b>Good</b>           | <b>Moderate</b>       | <b>Bad</b>            |
|-------------------------------------------------------------------------|-----------------------|-----------------------|-----------------------|
| H1-antihistamines of first generation                                   | <input type="radio"/> | <input type="radio"/> | <input type="radio"/> |
| H1-antihistamines of second generation in standard dose                 | <input type="radio"/> | <input type="radio"/> | <input type="radio"/> |
| H1-antihistamines of second generation in high doses (2-4 times higher) | <input type="radio"/> | <input type="radio"/> | <input type="radio"/> |
| H2-antihistamines (e.g. famotidine or ranitidine)                       | <input type="radio"/> | <input type="radio"/> | <input type="radio"/> |
| Ciclosporin                                                             | <input type="radio"/> | <input type="radio"/> | <input type="radio"/> |
| Omalizumab                                                              | <input type="radio"/> | <input type="radio"/> | <input type="radio"/> |
| Montelukast                                                             | <input type="radio"/> | <input type="radio"/> | <input type="radio"/> |
| Dapsone                                                                 | <input type="radio"/> | <input type="radio"/> | <input type="radio"/> |
| Systemic corticosteroids (for less than 10 days)                        | <input type="radio"/> | <input type="radio"/> | <input type="radio"/> |
| Systemic corticosteroids (for more than 10 days in a row)               | <input type="radio"/> | <input type="radio"/> | <input type="radio"/> |



**23 Do you record data from CSU patients?**

- No
- Yes - Own database
- Yes - Hospital/Intitution's database
- Yes - National registry
- Yes - Registry organized by a Allergy or Dermatology medical society
- Yes - Other

**24 Have you ever heard of the possibility to enter patient data into the chronic urticaria registry (CURE) for scientific analyses ([www.urticaria-registry.com](http://www.urticaria-registry.com))?**

Please choose **only one** of the following:

- Yes
- No

**Thank you for taking your time to participate in our survey! If there are any comments or suggestions please enter them below.**

Please write your answer here:

---

**Thank you very much for your participation!**
